# Supplementary material
Source: MDPI journal article supplement (https://www.mdpi.com/2073-4344/11/8/960)
Supplement: s1 [file s1]

# Supplementary Materials: Reduced Graphene Oxide Supported Cobalt-Calcium Phosphate Composite for Electrochemical Water Oxidation

Keunyoung Lee <sup>1</sup>, Wonseok Yang <sup>2</sup>, Eunji Pyo <sup>1</sup>, Hyebin Choi <sup>1</sup>, Yeona Cha <sup>1</sup>, Seonhong Lee <sup>3</sup>, Chung Soo Kim <sup>3</sup>, Dong-Kwon Lim <sup>2,\*</sup> and Ki-Young Kwon <sup>1,\*</sup>

<sup>1</sup> Department of Chemistry, Gyeongsang National University, Jinju, 52828, South Korea; sofianto96@gnu.ac.kr (K.Y.L.); eunji2684@gnu.ac.kr (E.J.P.); gpqls3214@gnu.ac.kr (H.B.C.); 2019010957@gnu.ac.kr (Y.A.C.)

<sup>2</sup> KU-KIST Graduate School of Converging Science and Technology, Korea University, Seoul, 02841, South Korea; wowbluesky@korea.ac.kr

<sup>3</sup> Analysis & Certification Center, Korea Institute of Ceramic Engineering & Technology, Jinju, 52851, South Korea; sh0381@kicet.re.kr

\* Correspondence: dklim@korea.ac.kr (D.-K.L.); kykwon@gnu.ac.kr (K.-Y.K.); Tel.: +82-2-3290-4611 (D.-K.L.); +82-55-772-1493 (K.-Y.K.)

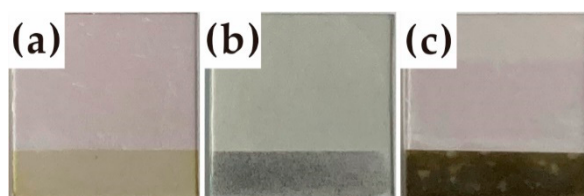

**Figure S1.** Photographs of ITO electrode (coated area :  $2 \times 0.5 \text{ cm}^2$ ). (a) an ITO electrode after the anodic electrolysis for an hour, (b) CaP/rGO ink coated ITO electrode, (c) CoCaP/rGO after the anodic electrolysis for an hour.

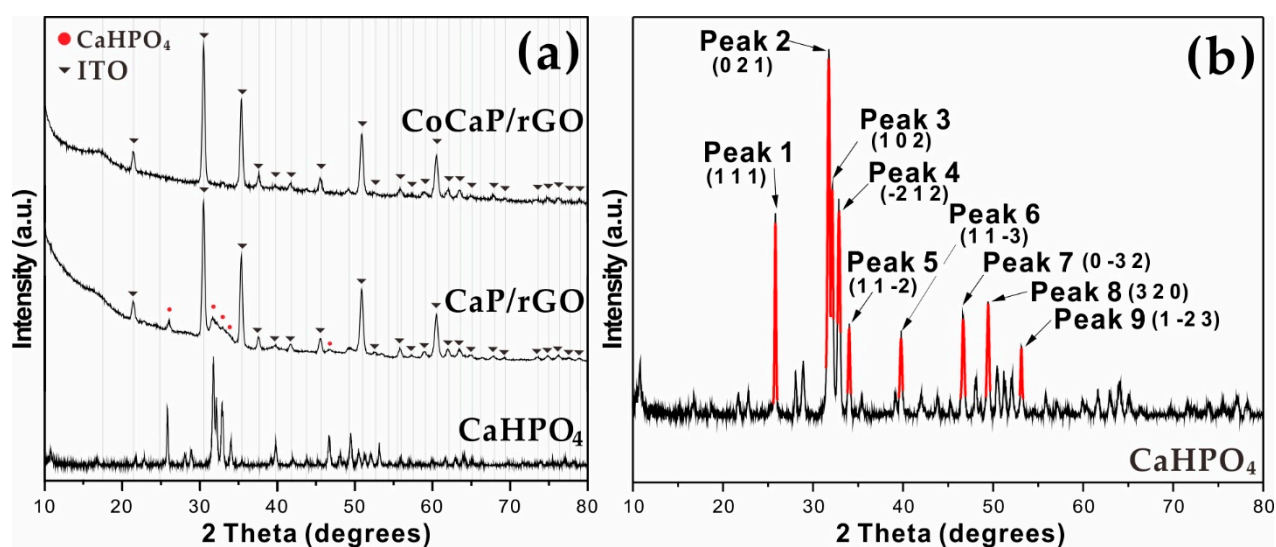

**Figure S2.** XRD patterns of (a) CaP/rGO, CoCaP/rGO (after anodic electrolysis in  $\text{Co}^{2+}$  aqueous solution for an hour) on ITO electrodes and  $\text{CaHPO}_4$  (monetite, red dots), diffraction patterns of an ITO are marked with reversed triangles, (b) Miller facets of nine peaks of  $\text{CaHPO}_4$ .

**Table S1.** Crystal size of monetite calculated from Scherrer equation (derived from XRD peaks of  $\text{CaHPO}_4$ ).

| Peak No. | 2 Theta (degrees) | Miller index (h k l) | FWHM ( $\beta$ ) | Crystallite size (nm) |
|----------|-------------------|----------------------|------------------|-----------------------|
| 1        | 25.819            | 1 1 1                | 0.186            | 43.265                |
| 2        | 31.762            | 0 2 1                | 0.277            | 29.445                |
| 3        | 32.134            | 1 0 2                | 0.239            | 34.138                |
| 4        | 32.865            | -2 1 2               | 0.354            | 23.119                |
| 5        | 34.029            | 1 1 -2               | 0.233            | 35.273                |
| 6        | 39.793            | 1 1 -3               | 0.290            | 28.805                |
| 7        | 46.641            | 0 -3 2               | 0.280            | 30.508                |
| 8        | 49.450            | 3 2 0                | 0.281            | 30.733                |
| 9        | 51.138            | 1 -2 3               | 0.176            | 49.884                |

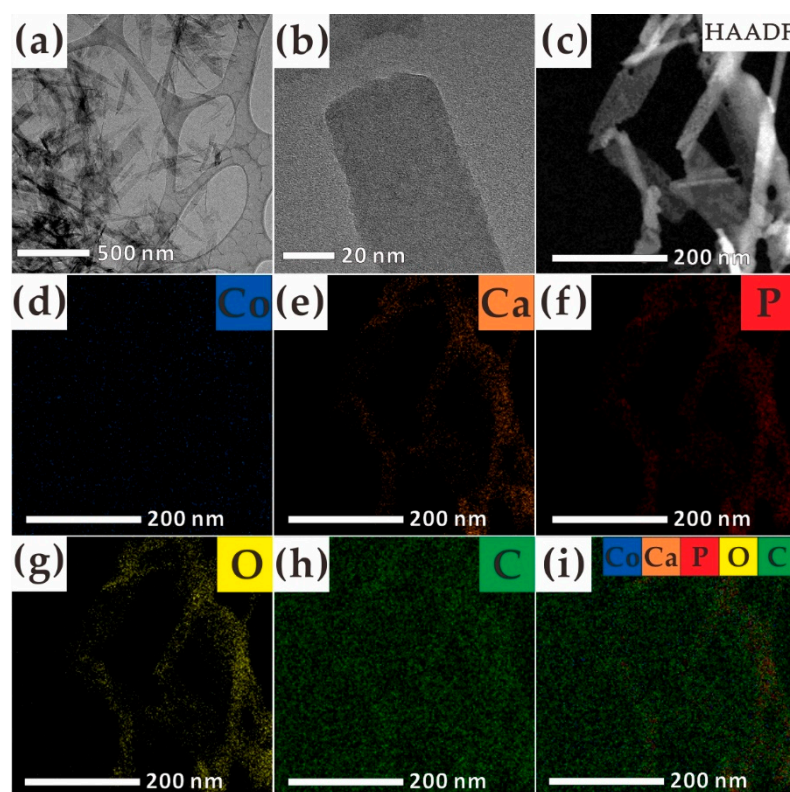

**Figure S3.** TEM images of (a) CaP/rGO, (b) high resolution TEM image of CaP/rGO and EDS elements mapping of CaP/rGO (c) TEM image, (d) Co, (e) Ca, (f) P, (g) O, (h) C and (i) overlapping of Co, Ca, P, O, C.

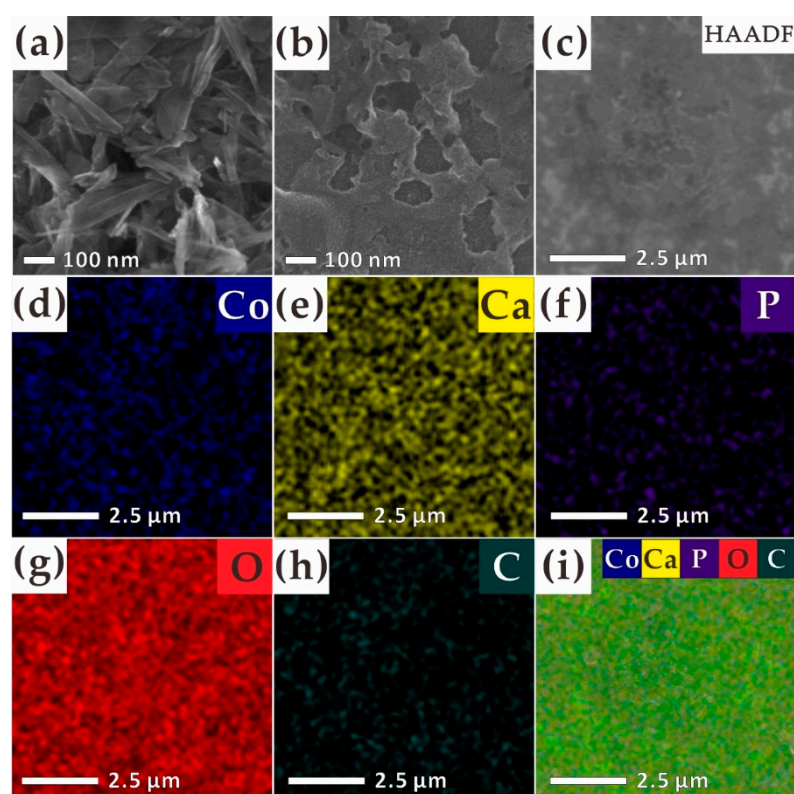

**Figure S4.** SEM images of (a) CaP/rGO, (b) CoCaP/rGO and EDS elements mapping of Co-CaP/rGO (c) SEM image, (d) Co, (e) Ca, (f) P, (g) O, (h) C and (i) overlapping of Co, Ca, P, O, C.

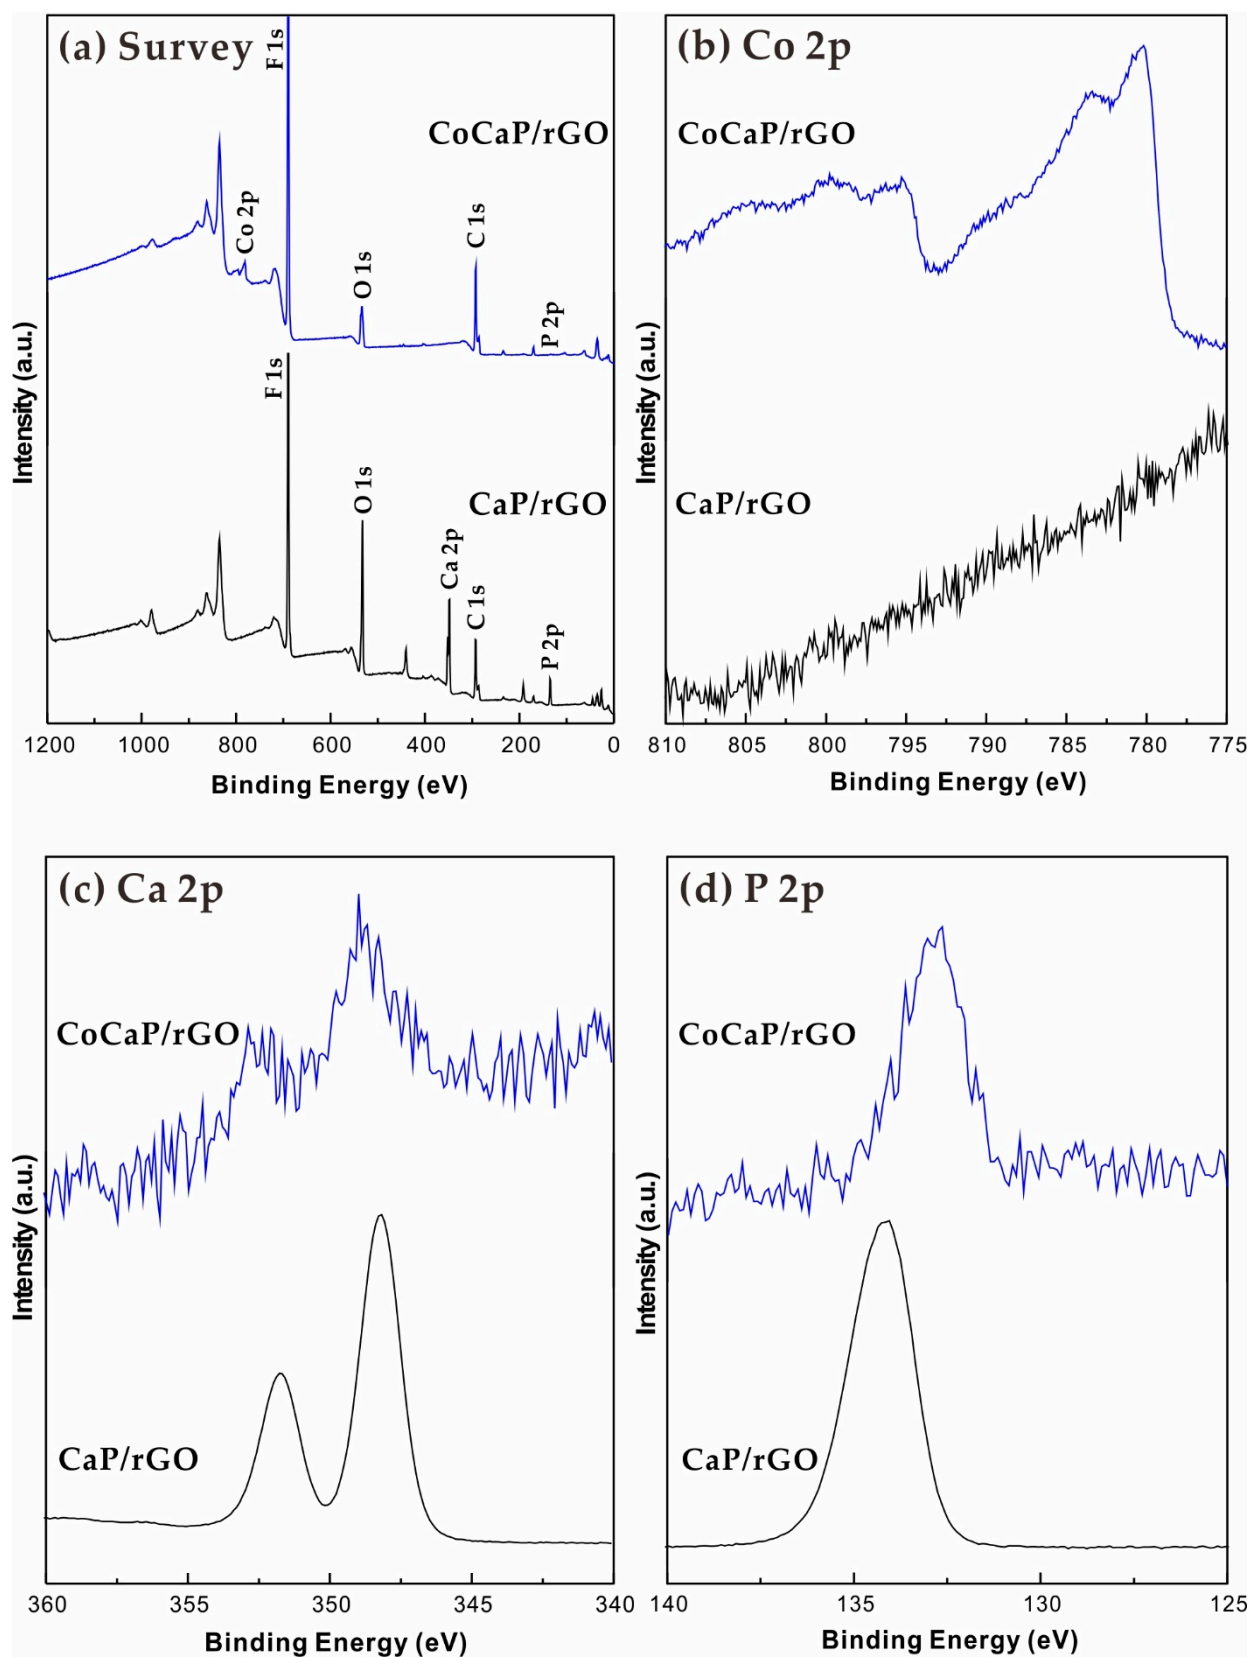

**Figure S5.** XPS spectrum of (a) Survey spectrum of CaP/rGO and CoCaP/rGO, (b) for Co 2p, (c) Ca 2p and (d) P 2p.

**Figure S6.** Cyclic Voltammetry (CV) measurements in the potential range of 0.5–0.6 V vs NHE with different sweep rates (20–200 mV/s). (a) CoCaP and (b) CoCaP/rGO

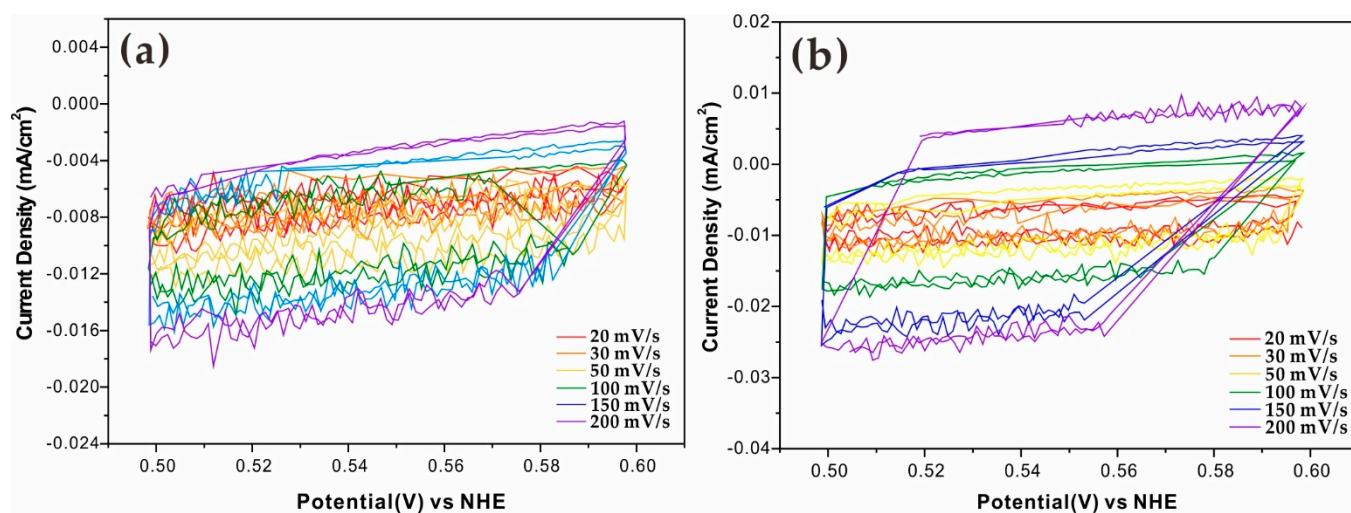

**Movie S1.** Anodic electrolysis of CaP/rGO at 1.3 V vs NHE for an hour in 20 mM Co<sup>2+</sup>.

**Movie S2.** Bulk electrolysis for an initial time, after 6 hr, 24 hr and 48 hr of the CoCaP/rGO on ITO electrode.
